# Supplementary material
Source: PubMed Central journal article supplement (PMC1748224)

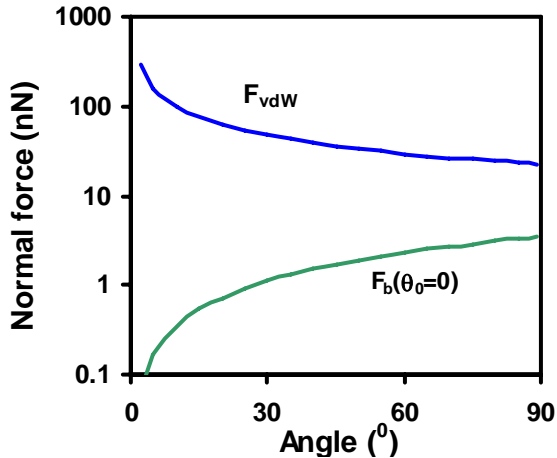

(a)

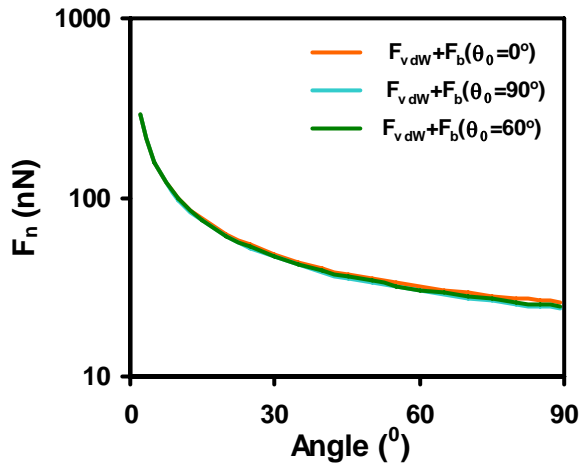

(b)

Supplement: pnas_0608841103_1.pdf [file pnas_0608841103_1.pdf]

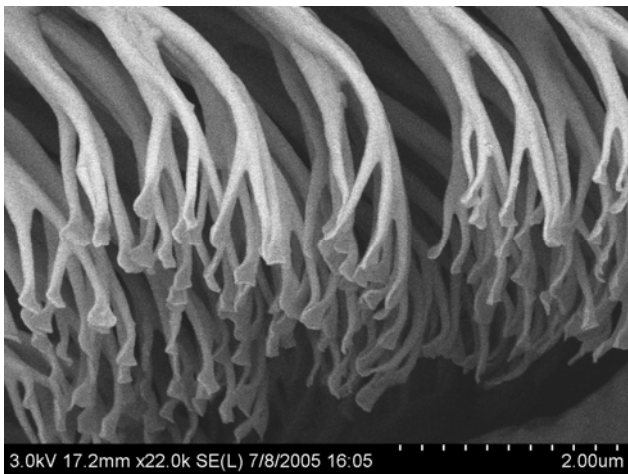

(a)

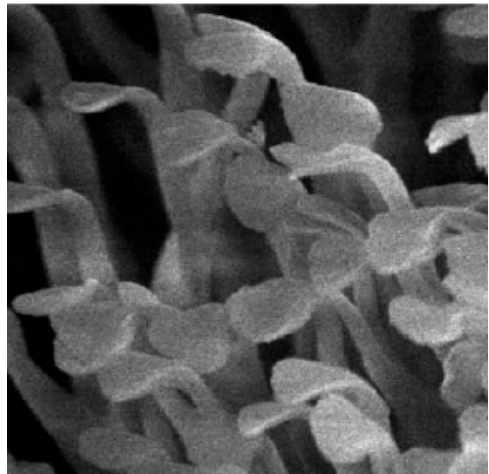

(b)

Supplement: pnas_0608841103_2.pdf [file pnas_0608841103_2.pdf]
